# Supplementary material
Source: publisher figshare collection journal article supplement (https://springernature.figshare.com/ndownloader/files/14195831)
Supplement: Supplementary file [file 14195831]

**Supplementary Fig. 3** Predicted secondary structures of the wild and mutant protein sequences flanking the remaining candidate rare mutations. The diagrams show the protein sequences with their secondary structures and their confidence values at the aligned positions. The secondary structure is annotated as follows: pink cylinder (alpha-helix); yellow arrow (beta-sheet); black line (coil); Conf, confidence; Pred, predict; H in Pred line (Helix); C in Pred line (coil); E in Pred line (sheet); AA, amino acid; ↑, mutant amino acid.

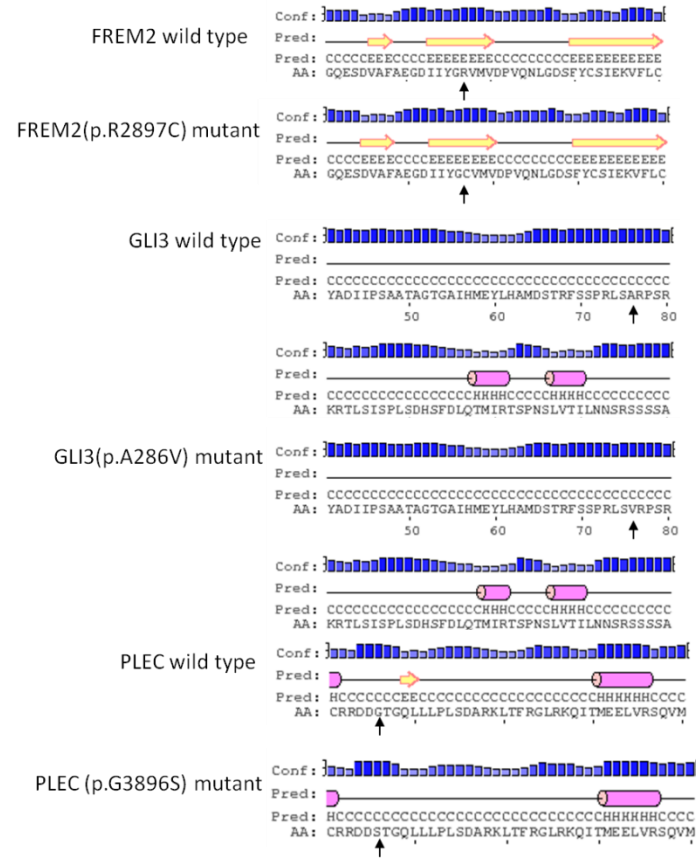

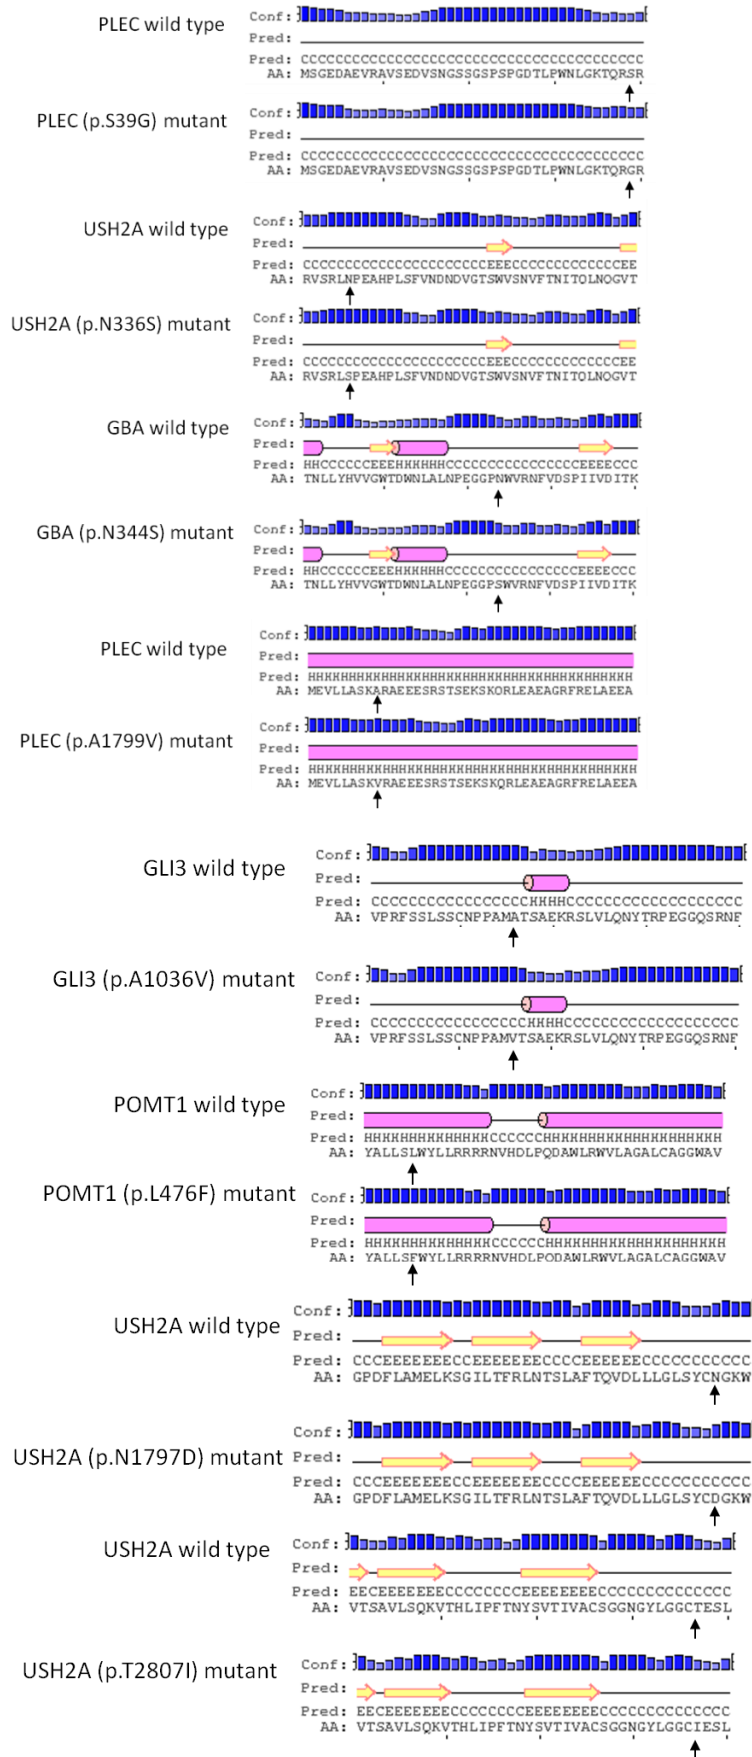

Conf:   
 Pred:   
 Pred: EEEEEEECCEEEEEECCCCCEEECCCCCEEEEEEE  
 AA: KEYQIRQVGGLIHDTDDRQKTVTGLQPYTNYSTLTA

Conf:   
 Pred:   
 Pred: EEEEEEECEEEEEEECCCCCEEECCCCCEEEEEEE  
 AA: KEYRIQVGKGLINTDTTDRRQHTVTGLQPYTNYSFTLT

Conf:   
 Pred:   
 Pred: CCEEEEEEEECCECCCCCEEEECCECCCCCCCCCE  
 AA: YTNYSFTLTACTSAGCTSSPEFLGQTLQAPEGVWVTPRH

Conf:   
 Pred:   
 Pred: CCCEEEEEEECCCECCCCCEEEECCECCCCCEEE  
 AA: YTSYSFTLTACTSAGCTSSPEFLGQTLQAPEGVWVTPR

Conf:   
 Pred:   
 Pred: CCCCCCEEEEECCCEEEEECCCCCCCCEEEEEEEC  
 AA: PEGVWTPRHIIINSTTVELYWSLPEKPNGLVSOYOLSRN

Conf:   
 Pred:   
 Pred: CCCCCCEEEEECEEEEECECCCCCEEEEEEEEC  
 AA: PEGVWTPRHIIINSTVELYWSLPEKLNGLYSOYLSRN

Conf:   
 Pred:   
 Pred: EEEEEEEEEECCECCCCCEEEEEEEEECCCCCEEEEC  
 AA: SGLNRFQFLFRRLDPFTLYTLTLEACTRAGCAHSAPOPLWT

Conf:   
 Pred:   
 Pred: EEEEEEEECCECCCCCEEEEEEEECCECCCCCEEEEC  
 AA: SGLNHOLFRRLOPFTLYTLTLEACTRAGCAHSAPOPLWT

Conf:   
 Pred:   
 Pred: CCCCCCCCCCEEEEECEEEEEEECCCCCEEEEE  
 AA: TLEAAPSEVSPDLWAVSAQMNVCWSPPTVQNGKITKYL

Conf:   
Pred:   
Pred: CCCCCCCCCCEEECCCEEEEEEECCCCCEEEEE  
AA: TLEAAPSEVSPDNLWAVSATQNMVCWSPTTQNKGTTKYL
